# Supplementary material for: Winter warming in Alaska accelerates lignin decomposition contributed by Proteobacteria
Source: Microbiome. 2020 Jun 5;8:84. doi: 10.1186/s40168-020-00838-5 (PMC7275452; doi:10.1186/s40168-020-00838-5)
Supplement: Supplementary file 3 — Additional file 2: Supplementary Table 1. Information of α-Proteobacterial metagenome-assembled genomes (MAGs). [file 40168_2020_838_MOESM2_ESM.xlsx]

## Sheet: Sheet1
Potential Genus	Bin ID	Total Length	N50	# contigs	Completeness	Contamination	SILVA-SSU Best Match ID	SILVA-SSU Best Match ID	Match ID	Match Length	SILVA-LSU Best Match ID	SILVA-SSU Best Match ID	Match ID	Match Length	Classification-GTDB	Classification_method	Closest_placement_ani	Other_related_references(genome_id,species_name,radius,ANI,AF)
Phenylobacterium	LY.5.iBin.7	4027455	213160	30	84.5	0	JX120449.1.1443	JX120449.1.1443_Bacteria;Proteobacteria;Alphaproteobacteria;Caulobacterales;Caulobacteraceae;Phenylobacterium;uncultured_bacterium	98.01	803	GU474858.223.3634	GU474858.223.3634_Unclassified;uncultured_alpha_proteobacterium_HF0070_14E07	84.78	828	d__Bacteria;p__Proteobacteria;c__Alphaproteobacteria;o__Caulobacterales;f__Caulobacteraceae;g__Phenylobacterium;s__	Placement	83.98	GCF_003254505.1, s__Phenylobacterium hankyongense, 95.0, 83.29, 0.63; GCF_000017265.1, s__Phenylobacterium zucineum_A, 95.0, 82.02, 0.56; GCA_003136395.1, s__Phenylobacterium sp003136395, 95.0, 81.53, 0.57; GCA_001824475.1, s__Phenylobacterium sp001824475, 95.0, 81.03, 0.55; GCA_001724985.1, s__Phenylobacterium sp001724985, 95.0, 80.95, 0.59; GCF_001557235.1, s__Phenylobacterium sp001557235, 95.0…
Bradyrhizobium	LY.7.iBin.6	3514132	26390	194	98.28	0.16					AWZU01000001.118359.121202	AWZU01000001.118359.121202_Bacteria;Proteobacteria;Alphaproteobacteria;Rhizobiales;Bradyrhizobiaceae;Bradyrhizobium;Bradyrhizobium_sp._ARR65	87.96	930	d__Bacteria;p__Proteobacteria;c__Alphaproteobacteria;o__Rhizobiales;f__Beijerinckiaceae;g__Bog-939;s__	Placement	80.94	GCA_003164825.1, s__Bog-939 sp003164825, 95.0, 78.0, 0.34
Bradyrhizobium	LY.8.iBin.3	5348614	56360	161	100	0	JQ622205.1.1480	JQ622205.1.1480_Bacteria;Proteobacteria;Alphaproteobacteria;Rhizobiales;Bradyrhizobiaceae;Bradyrhizobium;uncultured_alpha_proteobacterium	99.53	1480	AXAU01000005.336523.339364	AXAU01000005.336523.339364_Bacteria;Proteobacteria;Alphaproteobacteria;Rhizobiales;Bradyrhizobiaceae;Bradyrhizobium;Bradyrhizobium_elkanii_WSM1741	98.43	1016	d__Bacteria;p__Proteobacteria;c__Alphaproteobacteria;o__Rhizobiales;f__Xanthobacteraceae;g__Bradyrhizobium;s__	Placement	84.57	GCF_900129505.1, s__Bradyrhizobium erythrophlei_D, 95.0, 83.8, 0.7; GCF_900141755.1, s__Bradyrhizobium lablabi_A, 95.0, 83.56, 0.72; GCA_001464035.1, s__Bradyrhizobium sp001464035, 95.0, 83.53, 0.61; GCF_000701345.1, s__Bradyrhizobium sp000701345, 95.0, 83.49, 0.62; GCF_900129675.1, s__Bradyrhizobium erythrophlei_A, 95.0, 83.21, 0.69; GCA_900105125.1, s__Bradyrhizobium canariense_A, 95.0, 83.14, …
Phenylobacterium	LY.12.iBin.4	4699331	169079	56	100	0.3	HQ118388.1.1453	HQ118388.1.1453_Bacteria;Proteobacteria;Alphaproteobacteria;Caulobacterales;Caulobacteraceae;Phenylobacterium;uncultured_bacterium	98.14	807	GU474858.223.3634	GU474858.223.3634_Unclassified;uncultured_alpha_proteobacterium_HF0070_14E07	84.24	825	d__Bacteria;p__Proteobacteria;c__Alphaproteobacteria;o__Caulobacterales;f__Caulobacteraceae;g__Phenylobacterium;s__	Placement	83.87	GCF_003254505.1, s__Phenylobacterium hankyongense, 95.0, 83.36, 0.61; GCF_003254475.1, s__Phenylobacterium sp003254475, 95.0, 82.0, 0.57; GCF_000017265.1, s__Phenylobacterium zucineum_A, 95.0, 81.73, 0.5; GCA_001824475.1, s__Phenylobacterium sp001824475, 95.0, 81.0, 0.5; GCF_001557235.1, s__Phenylobacterium sp001557235, 95.0, 80.97, 0.46; GCA_001724985.1, s__Phenylobacterium sp001724985, 95.0, 80…
Sphingomonas	LY.26.iBin.6	3033329	367748	14	100	0	JN023466.1.1440	JN023466.1.1440_Bacteria;Proteobacteria;Alphaproteobacteria;Sphingomonadales;Sphingomonadaceae;Sphingomonas;uncultured_bacterium	99.59	1231	AHIR01000060.719.3497	AHIR01000060.719.3497_Bacteria;Proteobacteria;Alphaproteobacteria;Sphingomonadales;Sphingomonadaceae;Sphingomonas;Sphingomonas_echinoides_ATCC_14820	95.04	2782	d__Bacteria;p__Proteobacteria;c__Alphaproteobacteria;o__Sphingomonadales;f__Sphingomonadaceae;g__Sphingomonas;s__	Placement	N/A	GCF_001598415.1, s__Sphingomonas mali, 95.0, 82.12, 0.7; GCF_001598455.1, s__Sphingomonas pruni, 95.0, 82.02, 0.66; GCF_001598355.1, s__Sphingomonas asaccharolytica, 95.0, 81.93, 0.66; GCF_000241485.1, s__Sphingomonas sp000241485, 95.0, 80.46, 0.59; GCF_000632225.1, s__Sphingomonas sp000632225, 95.0, 80.19, 0.51; GCA_002292295.1, s__Sphingomonas sp002292295, 95.0, 79.98, 0.55; GCF_001423845.1, s_…
Phenylobacterium	LY.27.iBin.3	4444126	18191	347	100	1	HQ132473.1.1492	HQ132473.1.1492_Bacteria;Proteobacteria;Alphaproteobacteria;Caulobacterales;Caulobacteraceae;Phenylobacterium;uncultured_Phenylobacterium_sp	97.51	803	GU474858.223.3634	GU474858.223.3634_Unclassified;uncultured_alpha_proteobacterium_HF0070_14E07	84	825	d__Bacteria;p__Proteobacteria;c__Alphaproteobacteria;o__Caulobacterales;f__Caulobacteraceae;g__Phenylobacterium;s__	Placement	83.83	GCF_003254505.1, s__Phenylobacterium hankyongense, 95.0, 82.42, 0.55; GCF_003254475.1, s__Phenylobacterium sp003254475, 95.0, 81.21, 0.5; GCF_000017265.1, s__Phenylobacterium zucineum_A, 95.0, 80.63, 0.49; GCA_001824475.1, s__Phenylobacterium sp001824475, 95.0, 80.39, 0.5; GCF_001557235.1, s__Phenylobacterium sp001557235, 95.0, 80.31, 0.49; GCA_001724985.1, s__Phenylobacterium sp001724985, 95.0, …
Bradyrhizobium	LY.54.iBin.8	6251283	47078	241	98.3	0	LT670818.3497440.3498932	LT670818.3497440.3498932_Bacteria;Proteobacteria;Alphaproteobacteria;Rhizobiales;Xanthobacteraceae;Bradyrhizobium;Bradyrhizobium_erythrophlei	99.51	1423	CP000463.4850692.4853344	CP000463.4850692.4853344_Bacteria;Proteobacteria;Alphaproteobacteria;Rhizobiales;Bradyrhizobiaceae;Rhodopseudomonas;Rhodopseudomonas_palustris_BisA53	98.41	1135	d__Bacteria;p__Proteobacteria;c__Alphaproteobacteria;o__Rhizobiales;f__Xanthobacteraceae;g__Bradyrhizobium;s__	Placement	84.12	GCF_900129505.1, s__Bradyrhizobium erythrophlei_D, 95.0, 83.69, 0.68; GCF_900141755.1, s__Bradyrhizobium lablabi_A, 95.0, 83.51, 0.66; GCF_000701345.1, s__Bradyrhizobium sp000701345, 95.0, 83.37, 0.56; GCA_001464035.1, s__Bradyrhizobium sp001464035, 95.0, 82.98, 0.6; GCF_900129675.1, s__Bradyrhizobium erythrophlei_A, 95.0, 82.83, 0.64; GCA_900105125.1, s__Bradyrhizobium canariense_A, 95.0, 82.58,…
